# Supplementary material for: Does Prenatal Stress Shape Postnatal Resilience? – An Epigenome-Wide Study on Violence and Mental Health in Humans
Source: PubMed Central journal article supplement (PMC6477038; doi:10.3389/fgene.2019.00269), 2019-04-16
Supplement: Data_Sheet_1.pdf [file Data_Sheet_1.pdf]

## Supplementary Figures and Tables

### **Does prenatal stress shape postnatal resilience? – An epigenome-wide study on violence and mental health in humans.**

**Authors:** Fernanda Serpeloni, Karl M. Radtke, Tobias Hecker, Johanna Sill, Vanja Vukojevic, Simone Assis, Maggie Schauer, Thomas Elbert, Daniel Nätt

**This supplementary includes:**

|                |                                                |
|----------------|------------------------------------------------|
| Fig S1 to S8   | This PDF page 2-10.                            |
| Table S1 to S2 | This PDF page 11-12.                           |
| Text S1        | Separate R script in attached zip file.        |
| Text S2        | Separate explanation file in attached zip file |
| Data S1 to S4  | Separate tables in attached zip file.          |

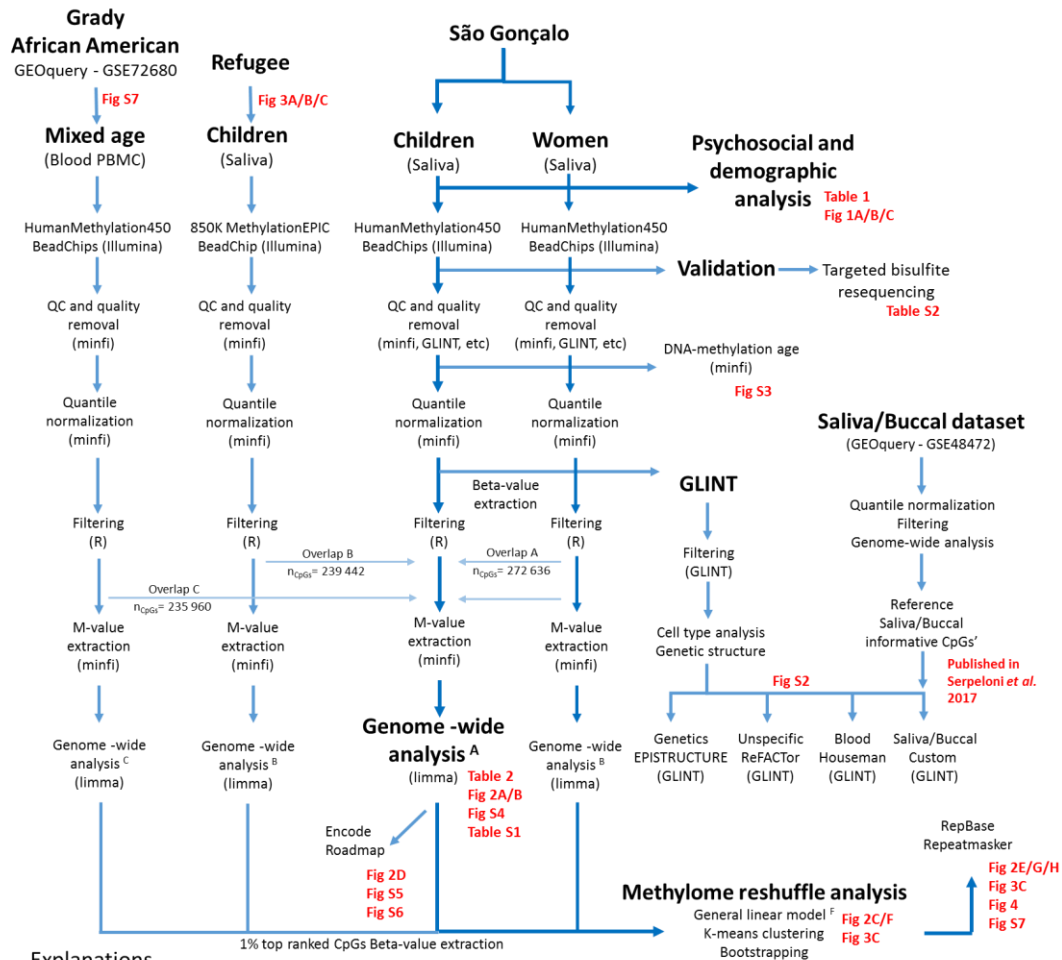

### Explanations

R = R project statistical computing (<https://www.r-project.org/>).

Bioconductor = Open source software for bioinformatics (<https://www.bioconductor.org/>).

minfi = Minfi package R/Bioconductor (<https://bioconductor.org/packages/release/bioc/html/minfi.html>).

Limma = limma package R/Bioconductor (<https://bioconductor.org/packages/release/bioc/html/limma.html>).

GEOquery = GEOquery package R/Bioconductor (<http://bioconductor.org/packages/release/bioc/html/GEOquery.html>).

GLINT = Software containing the EPISTRUCTURE, ReFACToR, and Houseman methods (<http://glint-epigenetics.readthedocs.io/en/latest/index.html>).

Custom = Saliva quality control GSE48472

WebGestalt = WEB-based Gene Set Analysis Toolkit (<http://webgestalt.org>).

Encode = Histone marks and transcription factor ChIP-seq data downloaded from ENCODE: <https://www.encodeproject.org/>; GSM78807 and GSM788079.

Roadmap = ChromHMM Core 15 dataset from Roadmap Epigenomic Project: [https://egg2.wustl.edu/roadmap/web\\_portal/chr\\_state\\_learning.html](https://egg2.wustl.edu/roadmap/web_portal/chr_state_learning.html).

RepBase = Repetitive DNA database (<http://www.girinst.org/repbase/>).

RepeatMasker = Software detecting repetitive and low complex sequences (<http://www.repeatmasker.org/>).

K-means clustering = Base R/Bioconductor; used to validate 50% cutoff.

Bootstrapping = Boot package R/Bioconductor; used to validate reshuffling.

Meth = Methylation at specific CpGs using the Illumina HumanMethylation450 or MethylationEPIC BeadChip.

P-IPV = Exposure to maternal prenatal intimate partner violence (children).

Psych = A history of treatment for psychiatric disorder.

Sex = Gender (co-variate in São Gonçalo and German children cohort).

Age = Age according to participant (co-variate in all statistical models).

CDV = Community domestic violence (co-variate to separate effects of IPV from CDV)

Trauma = Exposure to trauma (co-variate to separate effects of IPV from other traumatic events).

### Filtering

Overlap A = CpGs in common between São Gonçalo samples post filtering (both women and children).

Overlap B = CpGs in common between São Gonçalo samples and Refugee samples post filtering.

Overlap C = CpGs in common between all cohorts post filtering.

### Statistical models (Bold indicates main factor of interest)

<sup>A</sup> Meth=**P-IPV** + Age + Sex + prenatal CDV + prenatal Trauma

<sup>B</sup> Meth=**P-IPV** + Age + prenatal CDV + prenatal Trauma

<sup>C</sup> Meth=**Psych** + Age + Trauma

<sup>F</sup> Same as for Genome-wide analysis for each respective cohort.

For results using an extended model that includes more co-variates, see Table S1.

**Fig S1. Flow chart of all analyses in the experiment.**

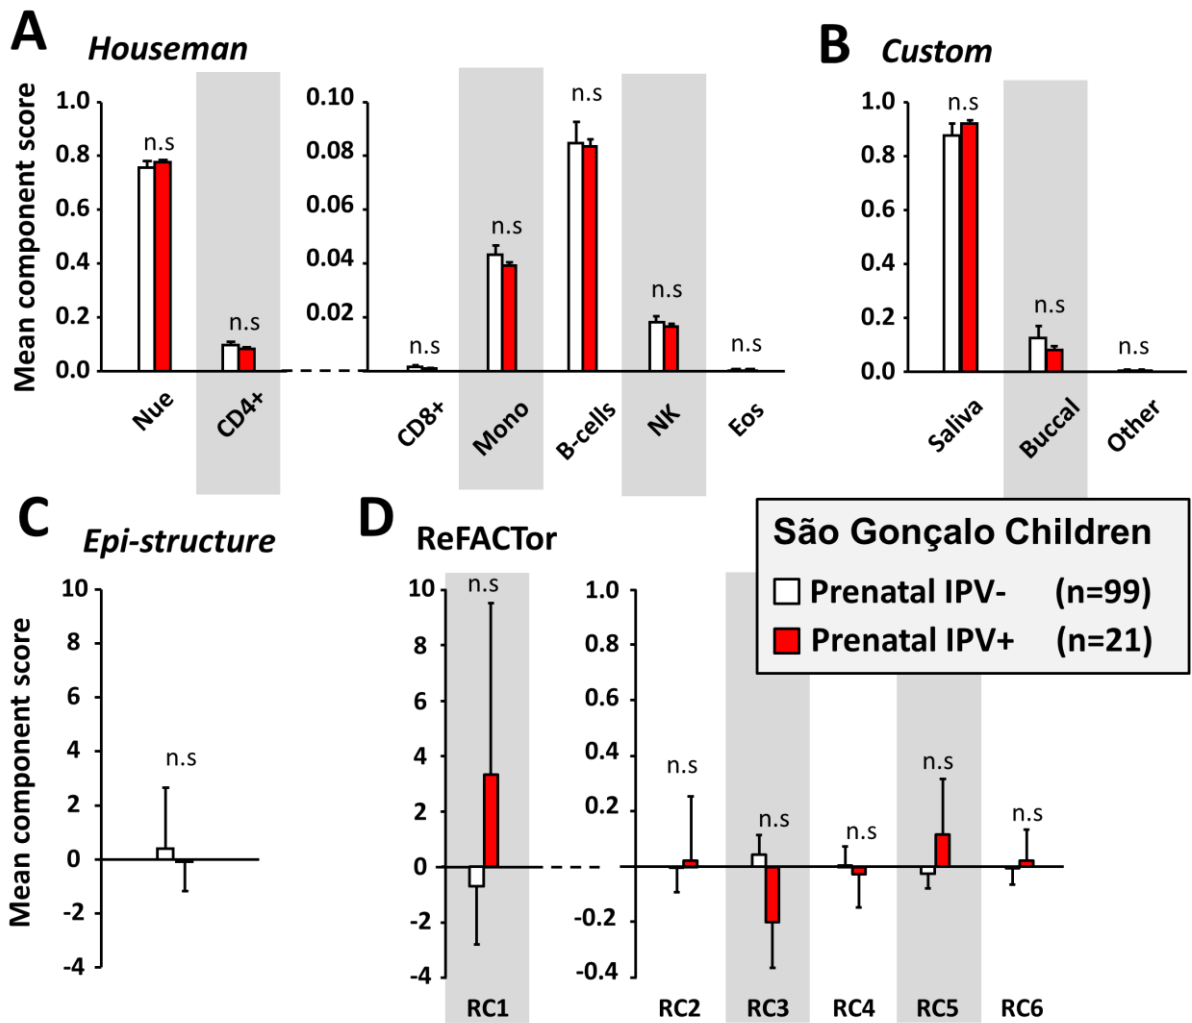

**Fig S2.** No difference in cell-type heterogeneity and genetic ancestry between IPV groups in São Gonçalo children. Graphs show the possible confounding effect of differing cell-type ratios and genetic structure between IPV- and IPV+ groups. Confounds were estimated using the DNA-methylation status at specific CpG panels known to be affected by the specific confound, using validated multivariate models. For more details about these models see methods. Cell-type heterogeneity, measured by the Houseman method with the blood reference panel (A) and our custom saliva/buccal reference panel (B), was not affect by prenatal IPV exposure in the São Gonçalo children. Neither were the groups differentially affected by genetic ancestry measured by the EPISTRUCTURE method (C). Similarly, no difference between IPV groups was observed using the independent ReFACTOR method (D). ReFACTOR scores gives cell-type ratios without the need for a unique cell-type reference panel. Bars represent the factor scores extracted from the GLINT software after the co-variants sex, age, prenatal CDV and trauma exposure have been adjusted for. n.s. indicates a non-significant result between IPV- and IPV+ using a Mann-Whitney U tests (not corrected for multiple testing). Error bars indicates SEM.

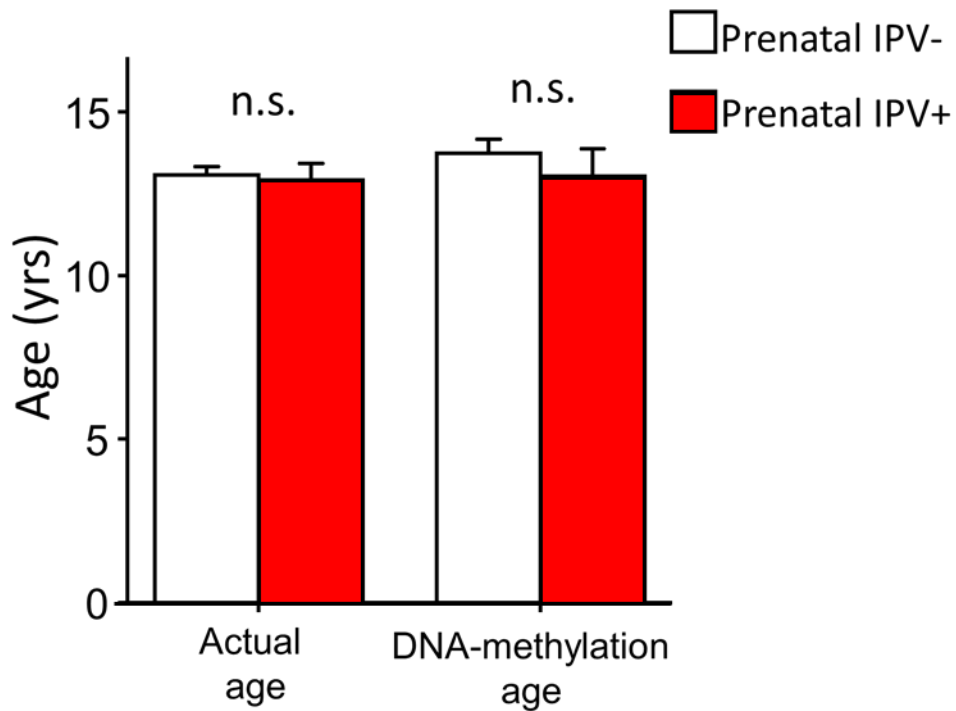

**Fig S3.** *Epigenetic age was not affected by prenatal IPV.* Neither actual age nor DNA-methylation age, as calculated using the Hovarth method (see Methods for details), were associated with exposure to prenatal IPV in the São Gonçalo children. Nevertheless, we included reported age as a covariate in all our analysis (IPV- n=99, IPV+ n= 21; error bars indicate SEM).

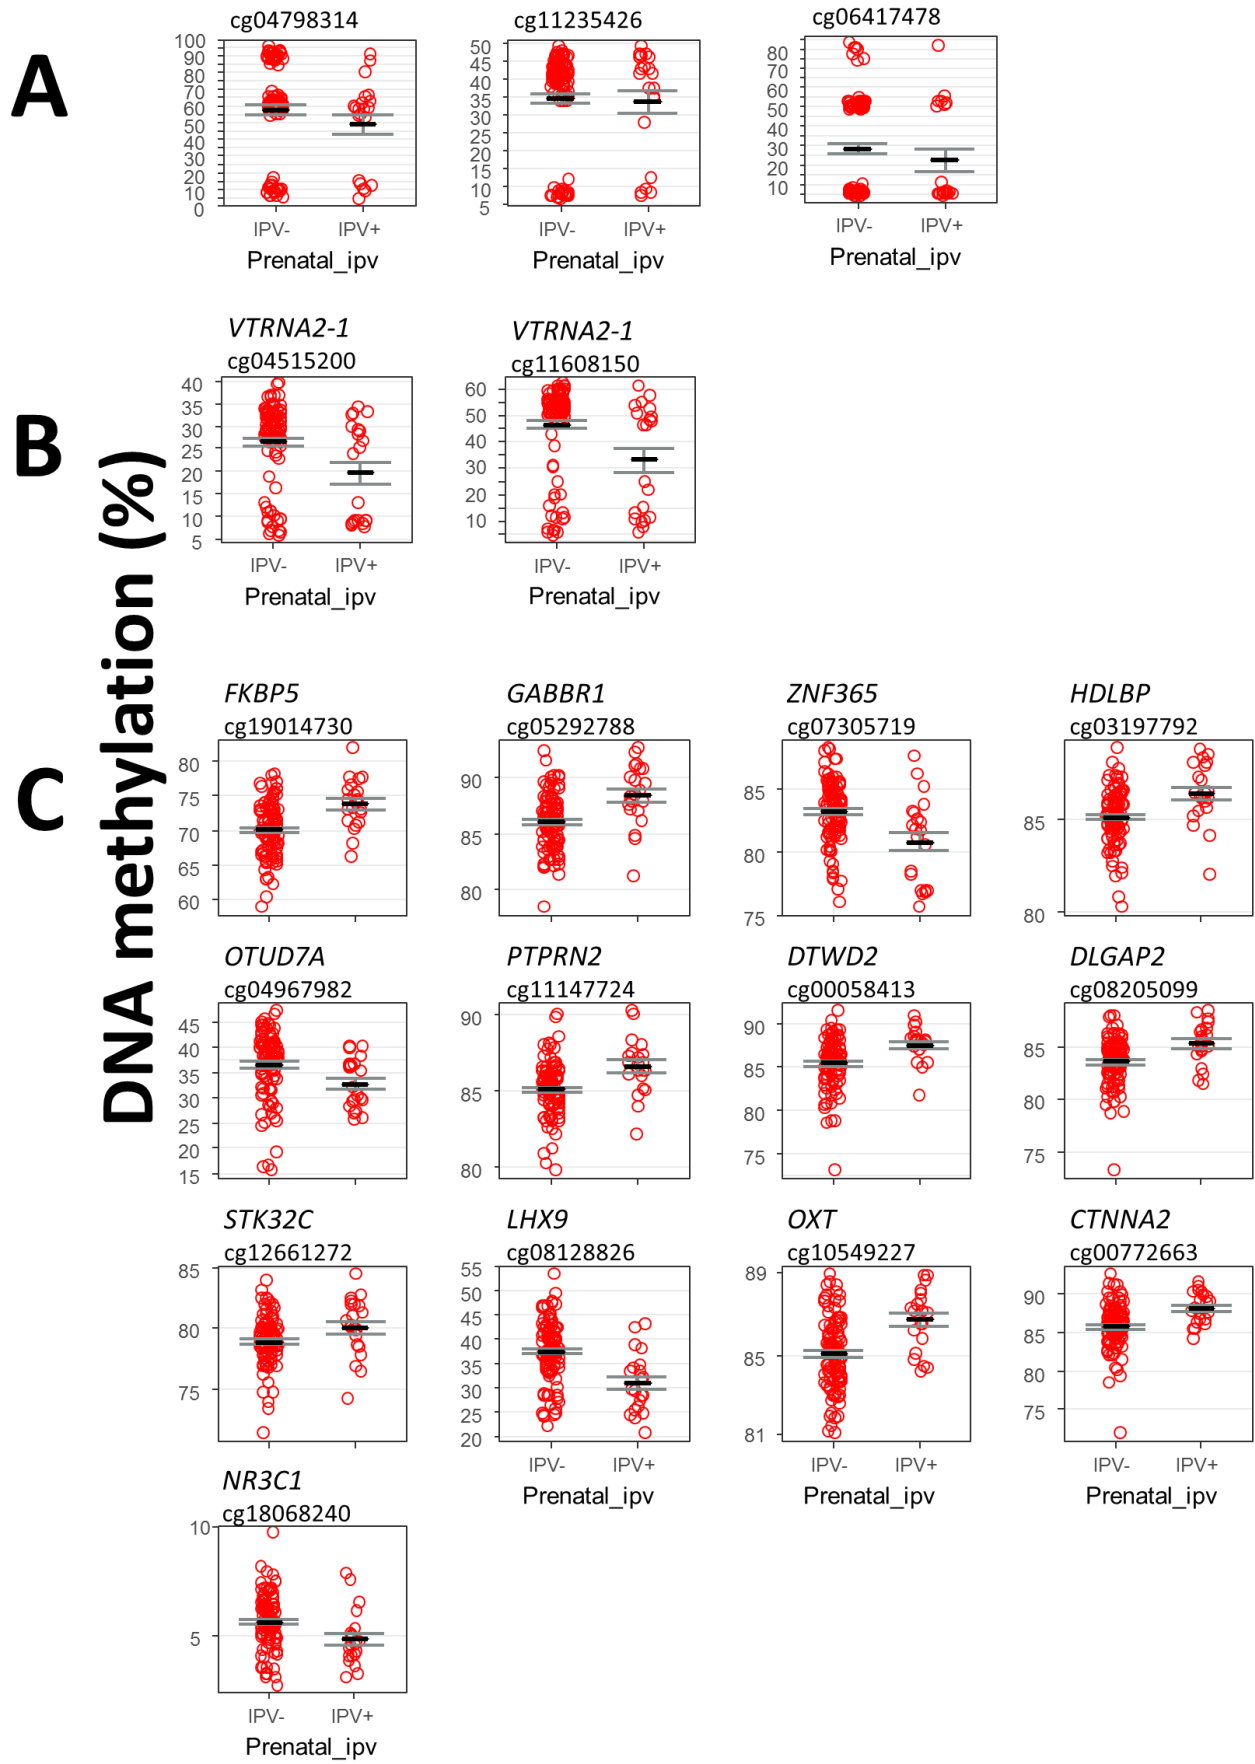

Fig S4. (Legend on next page)

**Fig S4.** *Local loss-of-methylation site polymorphism did not explain differences between IPV groups.* Single nucleotide polymorphism (SNP), where C have been substituted with T, A or G resulting in loss of methylation sites, may bias genome-wide methylation analysis. To minimize this possible confound, we applied two strategies. Firstly, we filtered out a list of CpGs known to harbor common SNPs (see methods for details). Secondly, we applied the robust procedure available in the limma package to our statistical models. The robust procedure is commonly used to minimize the influence of outliers in statistical models. Dot-plot panel **(A)** shows three typical examples of how genetic polymorphism in the São Gonçalo children results in methylation loss. Notice that loss of a methylation site typically leads to an averaged drop of 20-30% methylation between genotypes (homozygote C/C > 70%, heterozygote C/D  $\approx$  70-30%, and homozygote D/D < 30%, where D = all but C), and that genotypes typically cluster together. Also notice, that an occasional SNPs in a sample would appear as an outlier, in which the robust procedure would automatically decrease its influence on the result. Among our top candidate CpGs, only the two CpGs in the *VTRNA2-1* **(B)** showed signs of loss-of-methylation site polymorphism. Dot-plot panel **(C)** shows the 13 top candidates CpGs reported in Table 2 that previously been associated with stress or psychiatric disorders, of which none showed signs of loss-of-methylation site polymorphism. Red dots represent individual child methylation levels, while the black horizontal bar represent the group mean, and grey error bars the associated SEM (IPV- =99, IPV+ = 21).

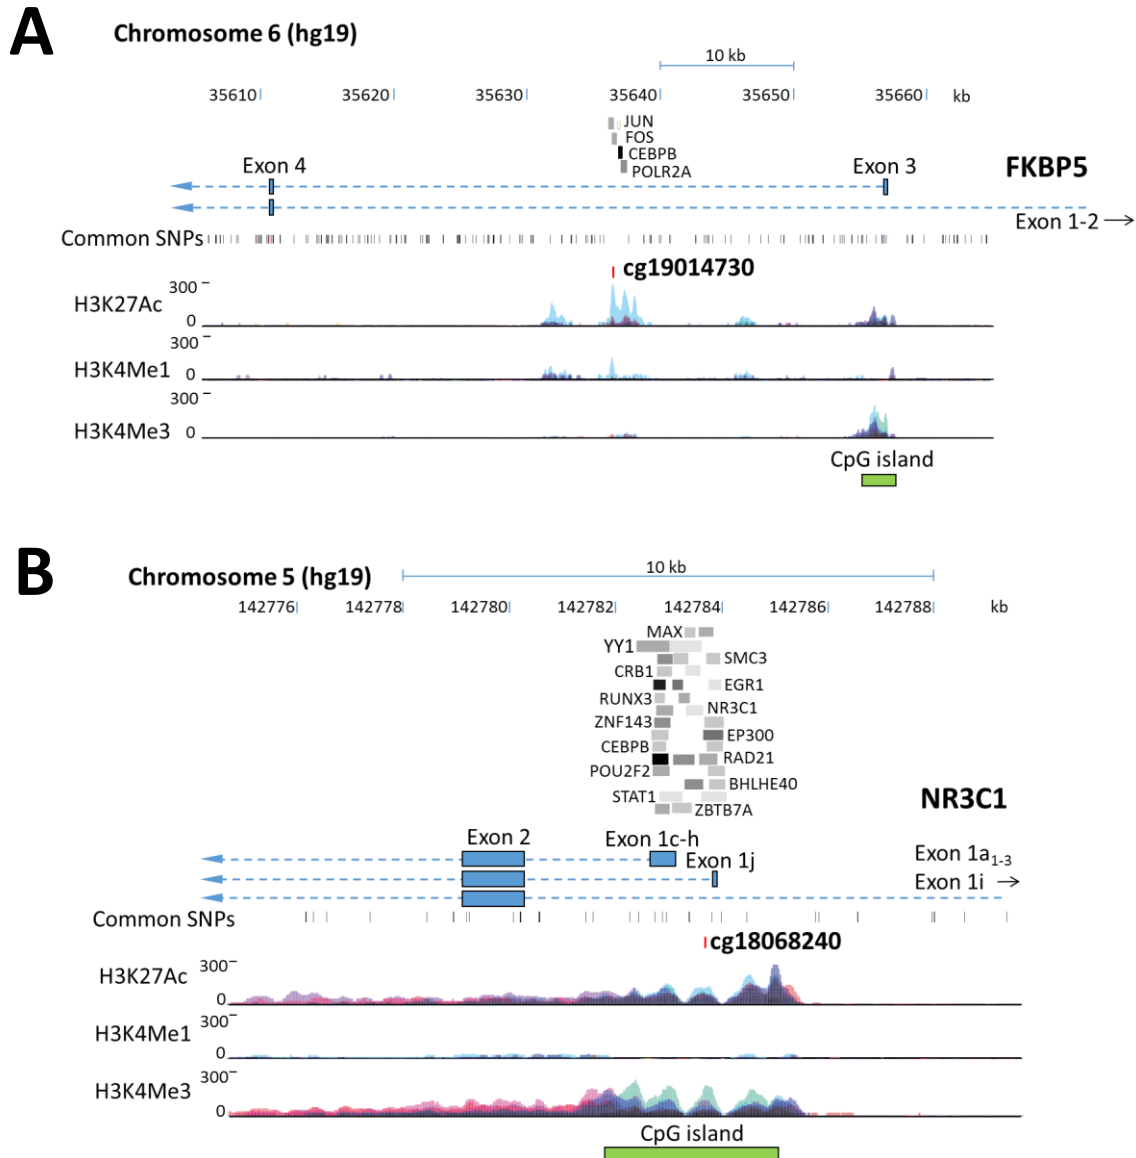

**Fig S5. Genomic context of two differentially methylated CpGs in *FKBP5* and *NR3C1*.** Blue boxes and dotted lines in shows (A) *FKBP5* (cg19014730) and (B) *NR3C1* (cg18068240) genes. Grey/black bands represent evidence for transcription factor binding (black=stronger, grey=weaker binding) in at least one cell line, and colored peaks histone modifications from several cell lines (one color per cell line) using chromatin immunoprecipitation (ChIP). Additional information about, for instance, what cell line evidence that are available for each band/peak, graphs can be further explored at their source at the UCSC genome browser (hg19) using the default settings under the Integrated Regulation from ENCODE Tracks. Due to the bare amount of evidence for transcription factors binding in region around the CpG in *NR3C1* (cg18068240), only transcription factors with multiple evidence are reported in (B).

*FKBP5*:

[http://genome-euro.ucsc.edu/cgi-bin/hgTracks?db=hg19&lastVirtModeType=default&lastVirtModeExtraState=&virtModeType=default&virtMode=0&nonVirtPosition=&position=chr6%3A35600690%2D35669904&hgSid=228754050\\_i33hAxjtfNtPBYearnc7sMmpENgy](http://genome-euro.ucsc.edu/cgi-bin/hgTracks?db=hg19&lastVirtModeType=default&lastVirtModeExtraState=&virtModeType=default&virtMode=0&nonVirtPosition=&position=chr6%3A35600690%2D35669904&hgSid=228754050_i33hAxjtfNtPBYearnc7sMmpENgy)

*NR3C1*:

[http://genome-euro.ucsc.edu/cgi-bin/hgTracks?db=hg19&lastVirtModeType=default&lastVirtModeExtraState=&virtModeType=default&virtMode=0&nonVirtPosition=&position=chr5%3A142776579%2D142789233&hgSid=228754050\\_i33hAxjtfNtPBYearnc7sMmpENgy](http://genome-euro.ucsc.edu/cgi-bin/hgTracks?db=hg19&lastVirtModeType=default&lastVirtModeExtraState=&virtModeType=default&virtMode=0&nonVirtPosition=&position=chr5%3A142776579%2D142789233&hgSid=228754050_i33hAxjtfNtPBYearnc7sMmpENgy)

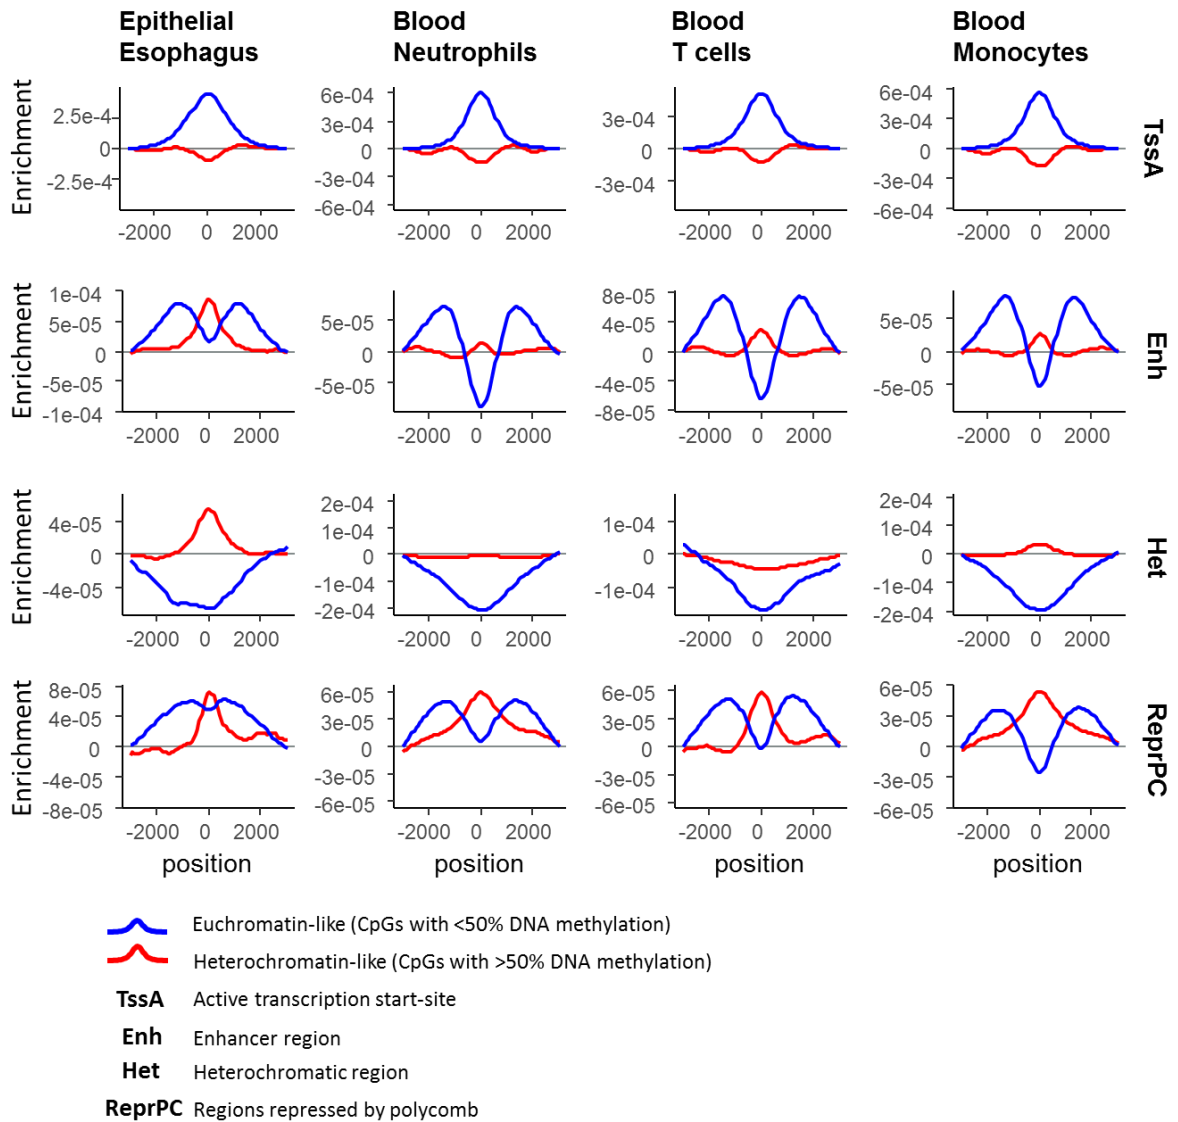

**Fig S6. Chromatin state analysis using ChromHMM.** Characteristics of the chromatin state in richly and poorly methylated regions. Graphs shows enrichment analyses of the overlap between chromatin states as defined by ChromHMM v1.10, and CpGs in the Euchromatin- (<50% methylation) and Heterochromatin-like (>50% methylation) regions, as identified in Fig 2C/D. We used the ChromHMM Core 15-state model that uses machine learning (a multivariate Hidden Markov Model) to categorize genomic regions based on 5 chromatin marks (H3K4me3, H3K4me1, H3K36me3, H3K27me3, H3K9me3). While ChromHMM provides chromatin states in a variety of cell-types, we only present the results from the most abundant cell-types in our saliva samples as given in Fig S2. ChromHMM Core 15 is part of the Roadmap epigenomics project and data can be found here: [https://egg2.wustl.edu/roadmap/web\\_portal/chr\\_state\\_learning.html](https://egg2.wustl.edu/roadmap/web_portal/chr_state_learning.html).



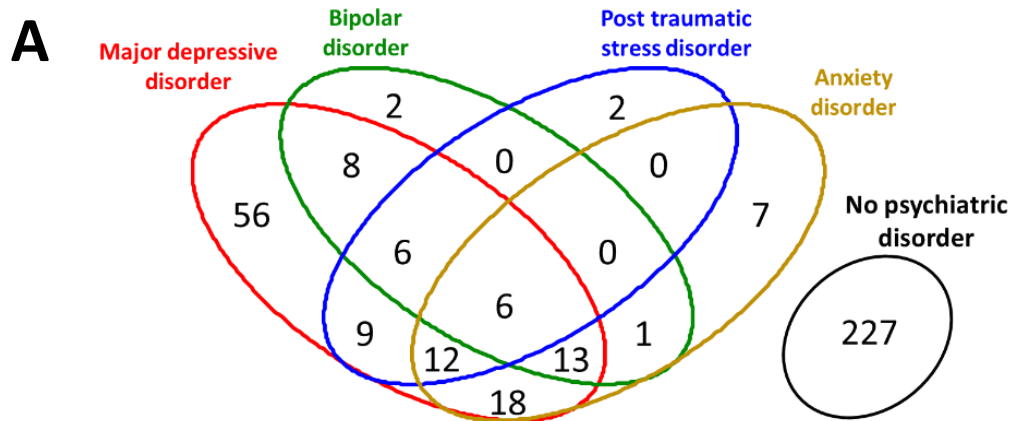

DNA-methylation profiles in the Grady study (GSE72680) n = 422  
 Participants with full psychiatric treatment data n = 367  
 Participants that had undergone psychiatric treatment n = 140

**B**

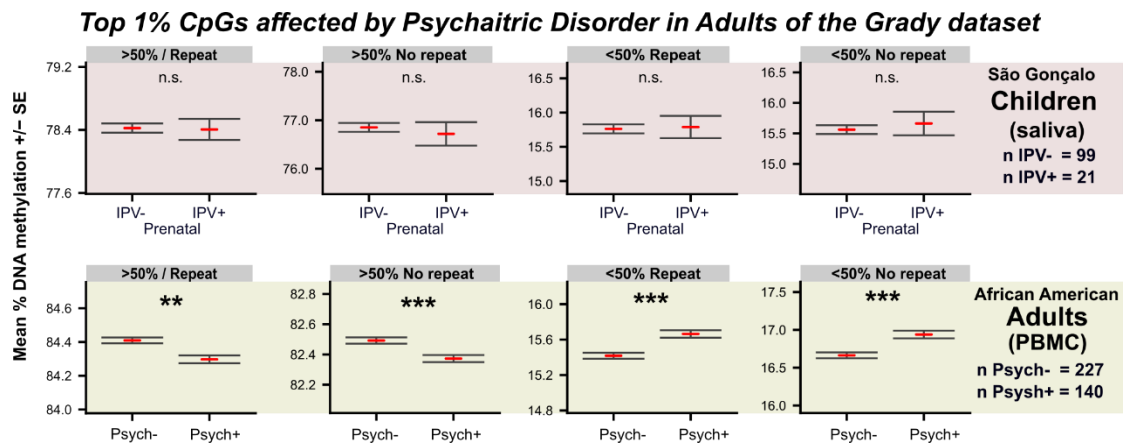

**Fig S7. A Methylome switch associated with psychiatric treatment in the Grady study.** To make an initial exploration of how methylome switching appears in diagnosed psychiatric disorders, we downloaded the freely available Grady dataset (GEO accession number: GSE72680). The Grady dataset contains Illumina HumanMethylation450 (same platform used to generate the São Gonçalo dataset) from PBMC blood cells. It also contains information whether the subjects have a history of psychiatric treatment or not. **(A)** Shows a Wenn-diagram of the comorbidity structure of different psychiatric treatments in the Grady dataset. While treatment for Major depressive disorder was the most frequent treatment, comorbidity between psychiatric disorders was high, where 52% of the participants being treated for one disorder also had at least one secondary treatment. **(B)** Shows a methylome switch analysis of the 1% top differentially methylated CpGs between subjects with (Psych+) or without (Psych-) a history of psychiatric treatment. The graphs with yellow background show the methylome switch in the actual Grady subjects, while graphs with red background shows the same switch on the same CpGs, but in São Gonçalo children exposed (IPV+) or not exposed (IPV-) to prenatal IPV. The methylome switch analysis can be replicated from the original Grady dataset using the R script provided in Text S1 and data provided in Data S1-S4. \*\*\*  $p < 0.001$ , \*\*  $p < 0.01$  using a General Linear Model with Sex and Age as covariates.

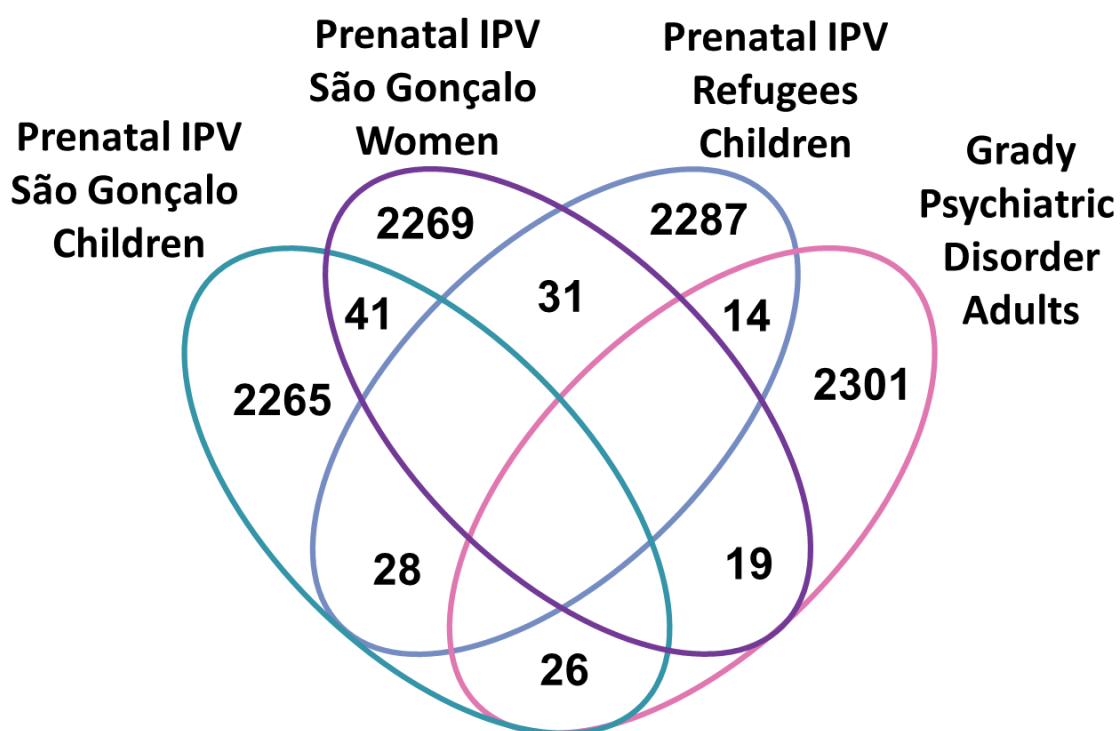

**Fig S8.** *Overlap between the 1% top differentially methylated CpGs across studies/populations.* Note that none of the 1% top CpGs overlapped more than two independent studies/populations. The analytical pipeline for generating the top 1% differentially methylated CpGs is available in the R script of Text S1 and can be tested using the data provided in Data S1-S4. The analysis only involved CpGs that showed enough detection signals in all datasets (detection signal p-value <0.01; see methods for details).

**Table S1.** Results using an extended statistical model that included additional co-variates.

| CpG ID     | Chromosome | Position (bp) | Strand | Closest Gene | Log2 fold change | Main model <sup>A</sup> |          |      | Extended model <sup>B</sup> |        |
|------------|------------|---------------|--------|--------------|------------------|-------------------------|----------|------|-----------------------------|--------|
|            |            |               |        |              |                  | Rank                    | p-value  | FDR  | p-value                     | FDR    |
| cg19014730 | 6          | 35635985      | +      | FKBP5        | 0.31             | 1                       | 2.60E-07 | 0.05 | 9.43E-06                    | 0.04   |
| cg04967982 | 15         | 31781955      | -      | OTUD7A       | -0.35            | 2                       | 4.39E-07 | 0.05 | 1.07E-04                    | 0.08   |
| cg11608150 | 5          | 135415948     | -      | VTRNA2-1     | -0.82            | 3                       | 5.07E-07 | 0.05 | 2.73E-08                    | 0.002  |
| cg12661272 | 10         | 134054521     | -      | STK32C       | 0.16             | 4                       | 1.12E-06 | 0.07 | 1.54E-05                    | 0.05   |
| cg02638458 | 7          | 155301811     | +      | CNPY1        | -0.23            | 5                       | 1.27E-06 | 0.07 | 2.69E-06                    | 0.02   |
| cg05292788 | 6          | 29586060      | +      | GABBR1       | 0.35             | 6                       | 1.52E-06 | 0.07 | 3.76E-06                    | 0.02   |
| cg24188111 | 5          | 54603732      | +      | DHX29        | 0.2              | 7                       | 1.91E-06 | 0.07 | 2.46E-06                    | 0.02   |
| cg24137863 | 11         | 80111021      | -      |              | 0.26             | 8                       | 2.40E-06 | 0.07 | 4.29E-04                    | 0.14   |
| cg11147724 | 7          | 157322117     | -      | PTPRN2       | 0.19             | 9                       | 2.46E-06 | 0.07 | 1.63E-05                    | 0.05   |
| cg08857436 | 7          | 90813370      | -      | CDK14        | 0.35             | 10                      | 3.20E-06 | 0.08 | 5.10E-05                    | 0.07   |
| cg08128826 | 1          | 197898217     | +      | LHX9         | -0.45            | 11                      | 3.61E-06 | 0.08 | 1.12E-05                    | 0.04   |
| cg27478707 | 6          | 32909781      | +      | HLA-DMB      | 0.28             | 12                      | 3.87E-06 | 0.08 | 5.48E-04                    | 0.15   |
| cg17403899 | 19         | 42893709      | -      | CNFN         | -0.22            | 13                      | 4.45E-06 | 0.08 | 2.19E-05                    | 0.05   |
| cg21721210 | 19         | 39574878      | -      | ACP7         | -0.29            | 14                      | 4.79E-06 | 0.08 | 1.88E-05                    | 0.05   |
| cg04914231 | 16         | 30006637      | +      | INO80E       | -0.37            | 15                      | 5.16E-06 | 0.08 | 8.49E-05                    | 0.08   |
| cg07305719 | 10         | 64133406      | -      | ZNF365       | -0.27            | 16                      | 5.31E-06 | 0.09 | 6.14E-04                    | 0.16   |
| cg04515200 | 5          | 135415762     | +      | VTRNA2-1     | -0.7             | 17                      | 5.57E-06 | 0.09 | 2.47E-09                    | 0.0003 |
| cg00058413 | 5          | 118271271     | +      | DTWD2        | 0.27             | 18                      | 5.87E-06 | 0.09 | 1.64E-03                    | n.s.   |
| cg10549227 | 20         | 3048294       | -      | OXT          | 0.24             | 19                      | 6.29E-06 | 0.09 | 3.53E-05                    | 0.06   |
| cg20895092 | 11         | 64933339      | -      | SPDYC        | -0.21            | 20                      | 6.43E-06 | 0.09 | 7.18E-04                    | 0.17   |
| cg19365706 | 7          | 100414918     | +      | EPHB4        | 0.18             | 21                      | 6.51E-06 | 0.09 | 2.48E-03                    | 0.23   |
| cg21552292 | 5          | 14316516      | +      | TRIO         | 0.2              | 22                      | 7.60E-06 | 0.09 | 3.47E-04                    | 0.13   |
| cg10188592 | 2          | 198364785     | +      | HSPE1        | -0.42            | 23                      | 7.62E-06 | 0.09 | 1.49E-06                    | 0.02   |
| cg22043788 | 17         | 80879483      | -      | TBCD         | -0.3             | 24                      | 7.81E-06 | 0.09 | 1.03E-04                    | 0.08   |
| cg10616337 | 20         | 5986410       | -      | CRLS1        | -0.25            | 25                      | 7.84E-06 | 0.09 | 6.57E-06                    | 0.04   |
| cg08108641 | 9          | 135042030     | -      | NTNG2        | -0.22            | 26                      | 9.60E-06 | 0.1  | 4.13E-04                    | 0.14   |
| cg03197792 | 2          | 242190985     | -      | HDLBP        | 0.18             | 27                      | 1.05E-05 | 0.1  | 4.04E-05                    | 0.07   |
| cg08205099 | 8          | 1200896       | +      | DLGAP2       | 0.2              | 28                      | 1.07E-05 | 0.1  | 7.71E-05                    | 0.08   |
| cg05291178 | 3          | 10149466      | -      | FANCD2OS     | 0.21             | 29                      | 1.08E-05 | 0.1  | 2.48E-04                    | 0.12   |
| cg13494826 | 9          | 132472473     | +      | PRRX2        | 0.2              | 30                      | 1.13E-05 | 0.1  | 1.54E-03                    | n.s.   |
| cg00772663 | 2          | 79677079      | -      | CTNNA2       | 0.32             | 31                      | 1.13E-05 | 0.1  | 2.45E-04                    | 0.12   |
| cg18068240 | 5          | 142783843     | -      | NR3C1        | -0.32            | 39                      | 1.76E-05 | 0.12 | 7.23E-06                    | 0.04   |

<sup>A</sup> The main model used in the analysis for finding differentially methylated CpGs (used in Table 2):  
Meth = IPV + Age + Sex + CDV + trauma

<sup>B</sup> Data analyzed using an extended model with additional covariates:  
Meth = IPV + age + sex + CDV + trauma + income + addiction + chip + CD4 + CD8 + Nue + mono + Bcells + NK + saliva + buccal + epi

|           |                                                                         |
|-----------|-------------------------------------------------------------------------|
| Meth      | Methylation level (Y)                                                   |
| IPV       | Prenatal IPV+ vs IPV- (X)                                               |
| age       | Reported age (Table 1; Fig S3)                                          |
| sex       | Sex (Table 1)                                                           |
| CDV       | Prenatal community domestic violence score (Table 1)                    |
| trauma    | Prenatal trauma scores (Table 1)                                        |
| income    | Family income (Table 1)                                                 |
| addiction | Maternal smoking or alcohol use (Table 1)                               |
| chip      | Chip ID number (each bead chip contained 12 arrays)                     |
| CD4-NK    | Factor scores from the Houseman blood cell reference analysis (Fig S2)  |
| saliva    | Factor scores from custom saliva reference (Fig S2)                     |
| buccal    | Factor scores from custom buccal reference (Fig S2)                     |
| epi       | Factor scores from the Epistructure genetic structure analysis (Fig S2) |

**Table S2. Results and primer sequences for the validation of Infinium HumanMethylation450K BeadChip using targeted bisulfite sequencing.**

| Sample | Yield bisulfite sequencing |                    |                |                   | Bisulfite Conversion | Comparison with array target CpGs |          |
|--------|----------------------------|--------------------|----------------|-------------------|----------------------|-----------------------------------|----------|
|        | Mapped reads               | Mapping Efficiency | n CpGs covered | Avg. CpG Coverage |                      | Pearson correlation               | P-value  |
| S01    | 69761                      | 66%                | 108            | 5591X             | >99%                 | 0.96                              | <0.0001  |
| S02    | 58014                      | 71%                | 108            | 4853X             | >99%                 | 0.94                              | <0.0001  |
| S03    | 81533                      | 74%                | 108            | 6107X             | >99%                 | 0.94                              | <0.001   |
| S04    | 73717                      | 73%                | 108            | 5823X             | >99%                 | 0.94                              | <0.0001  |
| S05    | 64396                      | 72%                | 108            | 5061X             | >99%                 | 0.92                              | <0.001   |
| S06    | 66885                      | 72%                | 108            | 5448X             | >99%                 | 0.93                              | <0.001   |
| S07    | 86226                      | 69%                | 108            | 6331X             | >99%                 | 0.96                              | <0.0001  |
| S08    | 99207                      | 77%                | 108            | 7488X             | >99%                 | 0.91                              | <0.001   |
| S09    | 67465                      | 74%                | 108            | 5238X             | >99%                 | 0.94                              | <0.0001  |
| S10    | 54759                      | 74%                | 108            | 3963X             | >99%                 | 0.95                              | <0.0001  |
| S11    | 54296                      | 72%                | 108            | 4426X             | >99%                 | 0.93                              | <0.001   |
| S12    | 52821                      | 72%                | 108            | 4128X             | >99%                 | 0.96                              | <0.0001  |
| S13    | 71285                      | 70%                | 108            | 5661X             | >99%                 | 0.93                              | <0.0001  |
| S14    | 71832                      | 73%                | 108            | 5632X             | >99%                 | 0.92                              | <0.001   |
| S15    | 70161                      | 71%                | 108            | 5708X             | >99%                 | 0.95                              | <0.0001  |
| S16    | 67824                      | 75%                | 99             | 4176X             | >99%                 | 0.90                              | <0.001   |
| S17    | 62476                      | 77%                | 108            | 4645X             | >99%                 | 0.96                              | <0.0001  |
| S18    | 72547                      | 67%                | 108            | 6046X             | >99%                 | 0.94                              | <0.0001  |
| S19    | 63013                      | 67%                | 108            | 5001X             | >99%                 | 0.94                              | <0.0001  |
| S20    | 62125                      | 71%                | 108            | 5185X             | >99%                 | 0.96                              | <0.00001 |
| S21    | 66159                      | 71%                | 108            | 5769X             | >99%                 | 0.93                              | <0.001   |
| S22    | 65391                      | 69%                | 108            | 5063X             | >99%                 | 0.93                              | <0.0001  |
| S23    | 90698                      | 72%                | 108            | 6470X             | >99%                 | 0.93                              | <0.001   |
| S24    | 59314                      | 70%                | 108            | 4593X             | >99%                 | 0.96                              | <0.0001  |
| S25    | 65629                      | 70%                | 108            | 5160X             | >99%                 | 0.94                              | <0.0001  |
| S26    | 46640                      | 66%                | 108            | 3803X             | >99%                 | 0.93                              | <0.001   |
| S27    | 67222                      | 69%                | 108            | 5126X             | >99%                 | 0.95                              | <0.0001  |
| S28    | 67466                      | 67%                | 108            | 5562X             | >99%                 | 0.94                              | <0.0001  |
| S29    | 62425                      | 74%                | 108            | 4896X             | >99%                 | 0.93                              | <0.001   |
| S30    | 88432                      | 74%                | 108            | 6652X             | >99%                 | 0.95                              | <0.0001  |
| S31    | 68868                      | 69%                | 108            | 5798X             | >99%                 | 0.91                              | <0.001   |
| S32    | 56563                      | 72%                | 108            | 4233X             | >99%                 | 0.91                              | <0.001   |
| S33    | 44262                      | 73%                | 92             | 3598X             | >99%                 | 0.92                              | <0.001   |

Note: Assays were ordered at Zymo Research using their Targeted Sequencing for DNA Methylation Analysis

Primer sequences:

|                                    |                               |                                   |                                        |                                          |
|------------------------------------|-------------------------------|-----------------------------------|----------------------------------------|------------------------------------------|
| Target: cg18068240/chr5_142783844  | Read coverage: 4664±180 SEM   | Region: chr5:142783644-142783943  | Fwd: TYGTTTTTTTTTGAAGTTTTTTAGAGGG      | Rev: AAAACTCRCTCTACCCCTTAAC              |
| Target: cg17403899/chr19_42893710  | Read coverage: 1358±158 SEM   | Region: chr19:42893510-42893809   | Fwd: GGATAGATTTTGTATTGTTATAGTT         | Rev: CATTTCATAAACCTCTAAAATAAAAAACAAA     |
| Target: cg08128826/chr1_197898217  | Read coverage: 2961±217 SEM   | Region: chr1:197898067-197898366  | Fwd: TAATTGGGATTGGTTTGTAGGTTGGTTTA     | Rev: ATCACTACAATAAATAAAATTAATCAATCTATT   |
| Target: cg09963640/chr18_31157661  | Read coverage: 14376±550 SEM  | Region: chr18:31157511-31157810   | Fwd: TTTATGTGATTATGTTTTATATAGAAATGTTGA | Rev: TACAACITTAACACACATAATTAACACCACTACAA |
| Target: cg10516336/chr3_183735216  | Read coverage: 1825±115 SEM   | Region: chr3:183735166-183735465  | Fwd: GAGTTATTYGTGTATAGTTTTTGGTGG       | Rev: CRCCTCTAAACCTATAAACCC               |
| Target: cg21212505/chr7_117228958  | Read coverage: 4084±173 SEM   | Region: chr7:117228808-117229107  | Fwd: AGTGTGTAGATGTAATTTGTTAAAGTTA      | Rev: AATCAACTCCATTTATTTAAAAACCTATAAATT   |
| Target: cg06260077/chr11_27721350  | Read coverage: 789±32 SEM     | Region: chr11:27721150-27721449   | Fwd: GTTTATTTAGTTTTAATTTTGGGGAGTAG     | Rev: CCCTCCCCCAACCCAAAAATAA              |
| Target: cg01311051/chr16_30064897  | Read coverage: 311±17 SEM     | Region: chr16:30064747-30065046   | Fwd: TTTTGGATTGTTGTTTTTTTTTTATG        | Rev: TTAATCAACTCCTTCTTACCAAAAAATACC      |
| Target: cg19014730/chr6_35635985   | Read coverage: 2141±88 SEM    | Region: chr6:35635835-35636134    | Fwd: TTTTATGGTAATAGTAGATTATTGTATAAAA   | Rev: TCCRAAATACTATTCCCAACAT              |
| Target: cg12661272/chr10_134054522 | Read coverage: 34840±1245 SEM | Region: chr10:134054372-134054671 | Fwd: TGTTTTYGTGATTTTTGTAGGGGTAGA       | Rev: CAAAAAAGCTCRAACCCCAAAA              |
